# Supplementary material for: A CTAB-modified S/C nanocomposite cathode for high performance Li–S batteries
Source: Royal Society of Chemistry journal article supplement (doi:10.1039/c6ra16361k), 2016-01-01
Supplement: c6ra16361k1.pdf [file c6ra16361k1.pdf]

# CTAB-modified S/C nanocomposite cathode for high performance lithium–sulfur batteries

Xiuzhen Wang<sup>a</sup>, Sai Qin<sup>a</sup>, Pingping Sun<sup>a</sup>, Yueming Sun<sup>b</sup>, Qingyu Xu<sup>a, c, \*</sup>, Changwei

Lai<sup>b</sup>, Qi Fan<sup>b, \*</sup>

<sup>a</sup> Department of Physics, Southeast University, Nanjing 211189, China

<sup>b</sup> College of Chemistry and Chemical Engineering, Southeast University, Nanjing 211189, China

<sup>c</sup> National Laboratory of Solid State Microstructures, Nanjing University, Nanjing 210093, China

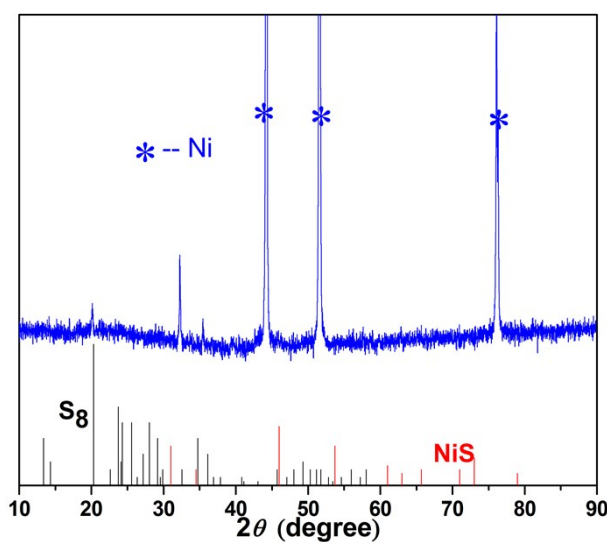

Fig. S1. The XRD patterns of sulfur on Ni foam after 40 cycles of charge-discharge processes. No diffraction peaks from NiS can be observed, excluding the formation of NiS.

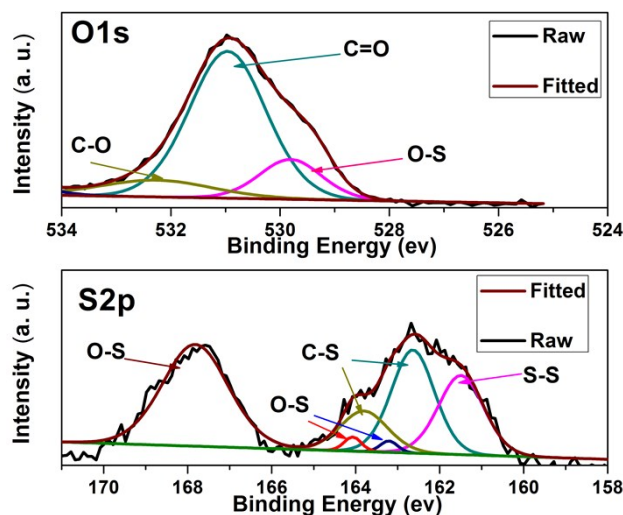

Fig. S2. XPS spectra of S/RGO nanocomposite. In the high-resolution O 1s spectrum (a), the strong peak at 530.8 eV can be fitted by three peaks, which are assigned to C-O bond, C=O bond and O-S bond respectively.<sup>1,2</sup> In the high-resolution S 2p spectrum (b), two strong peaks at about 162.8 eV and 161.5 eV are observed, which can be assigned to active S species with the C-S and S-S bond. The shoulder peaks (164.3 eV, 163.2 eV and 163.8 eV) are attributed to the O-S and C-S bonds.<sup>3</sup> Furthermore, the peak at 168.2 eV can be assigned to the O-S bond arising from the sulphate species formed by oxidation of S. These chemical bonds between RGO and S can trap the S on the surface of RGO and limit the diffusion of lithium polysulfide into the electrolyte.<sup>3</sup>

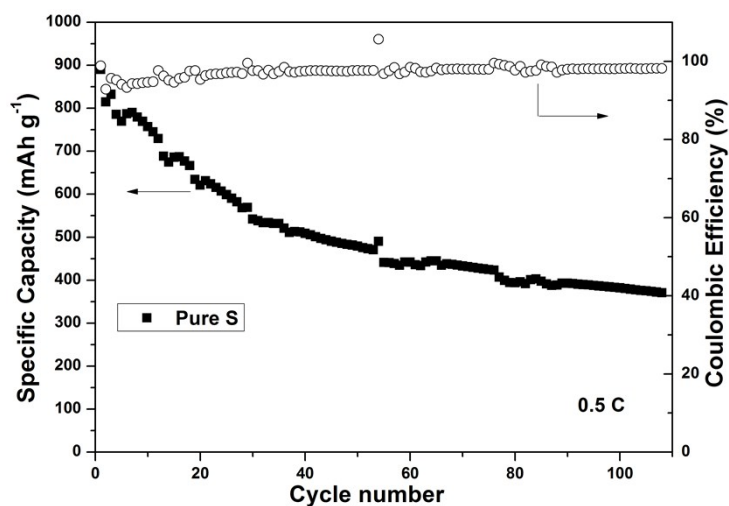

Fig. S3. The cycling performance of the pure S cell using LiNO<sub>3</sub>-free electrolyte.

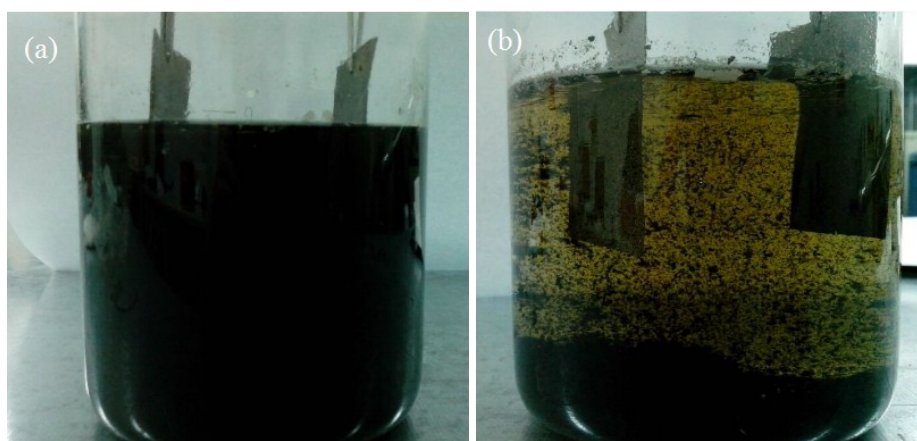

Fig. S4. (a) The mixed aqueous solution of  $\text{Na}_2\text{S}\cdot 9\text{H}_2\text{O}$  and GO with CTAB showed very good dispersion and uniformity as working-solution. (b) Many of the RGO sediments were found at the bottom of the beaker without CTAB during the electrochemical assembly processes.

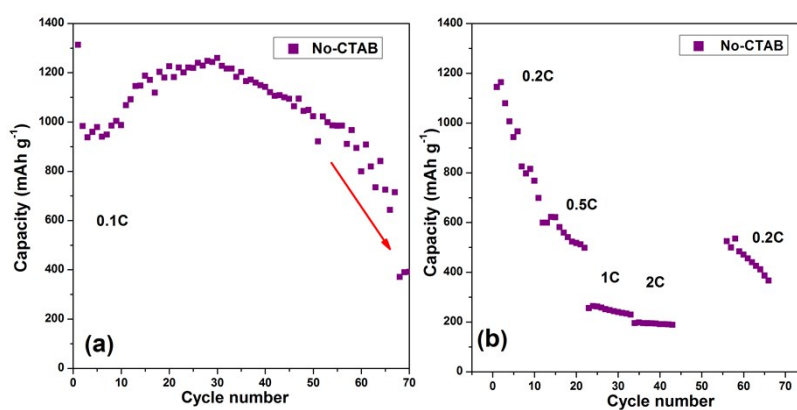

Fig. S5. (a) Cycling performance of S/RGO composite without CTAB modified cathodes at the 0.1C rate. (b) Poor rate performances of S-RGO cathodes.

## References

- [1] L. Zhang, L. Ji, P. Glans, Y. Zhang, J. Zhu, J. Guo, *Phys. Chem. Chem. Phys.*, 2012, 14, 13670.
- [2] S. Y. Yuan, Z. Y. Guo, L. N. Wang, S. Hu, Y. G. Wang, and Y. Y. Xia, *Adv. Sci.*, 2015, 2, 1500071.
- [3] X. F. Feng, M. K. Song, W. C. Stolte, D. Gardenghi, D. Zhang, X. H. Sun, J. F. Zhu, E. J. Cairns, J. H. Guo, *Phys. Chem. Chem. Phys.*, 2014, 16, 16931.
